# Supplementary material for: Integrative Analysis of Deep Sequencing Data Identifies Estrogen Receptor Early Response Genes and Links ATAD3B to Poor Survival in Breast Cancer
Source: PLOS journal article supplement (doi:10.1371/journal.pcbi.1003100), 2013-06-20

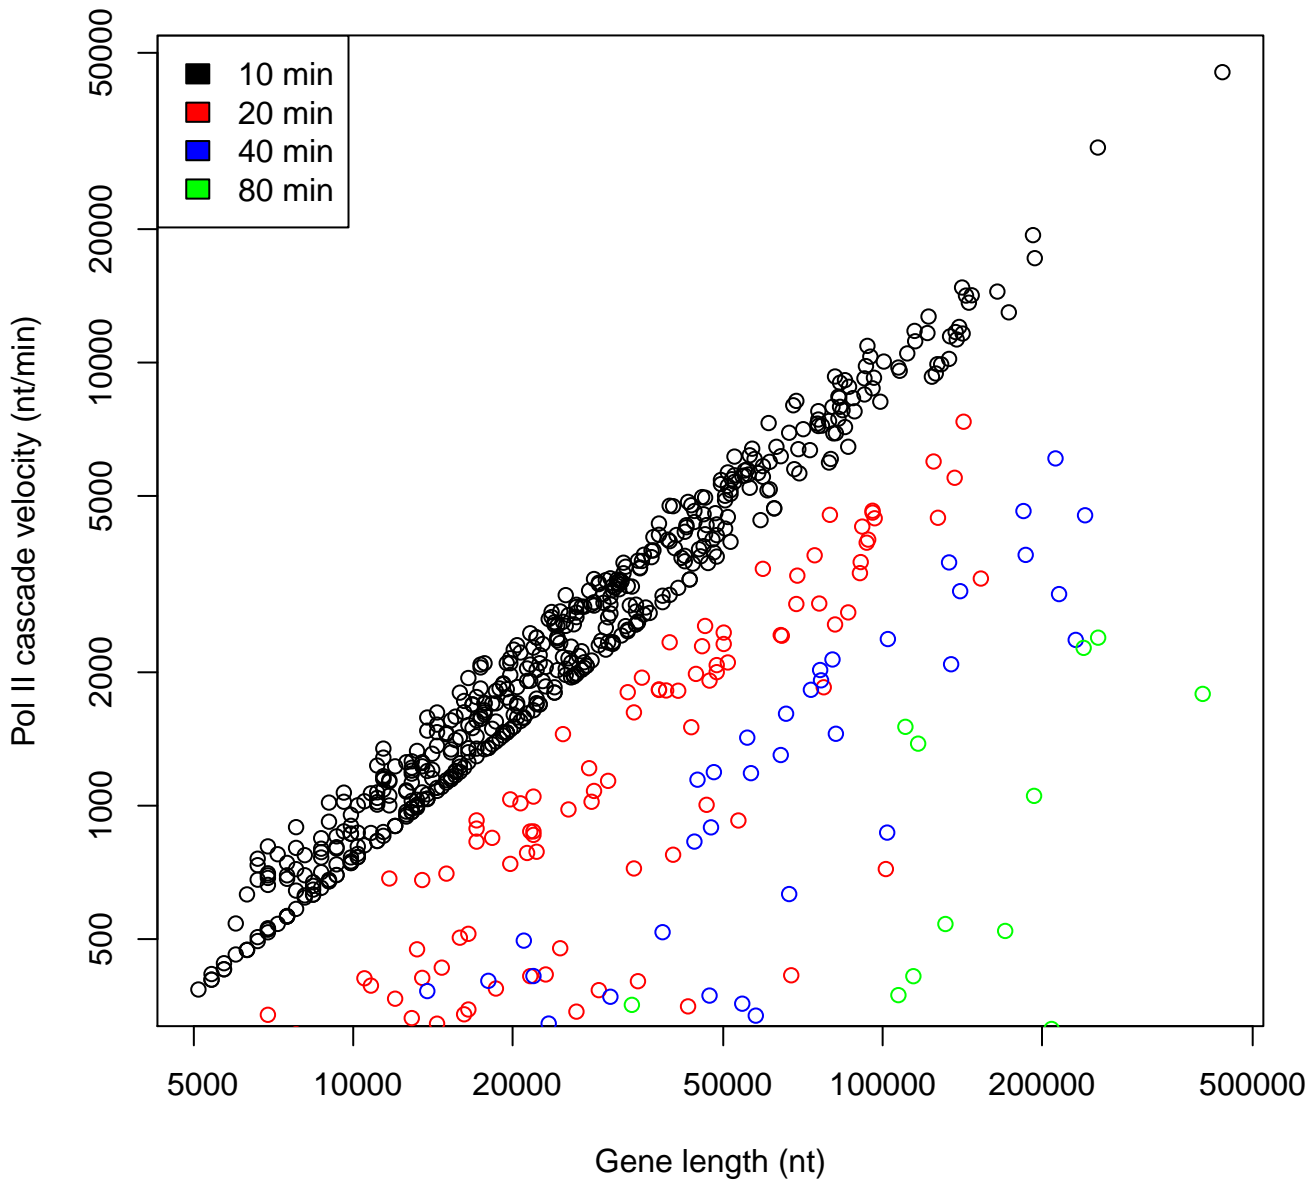

Supplement: S20 (10.1371/journal.pcbi.1003100.s020) [file journal.pcbi.1003100.s020]
